# Supplementary material for: Targeted Disruption of the S1P 2 Sphingosine 1-Phosphate Receptor Gene Leads to Diffuse Large B-Cell Lymphoma Formation
Source: Oxford University Press journal article supplement (doi:10.1158/0008-5472.can-09-1110), 2009-11-10
Supplement: 00085472can091110-sup-sfi_g1.pdf [file 00085472can091110-sup-sfi_g1.pdf]

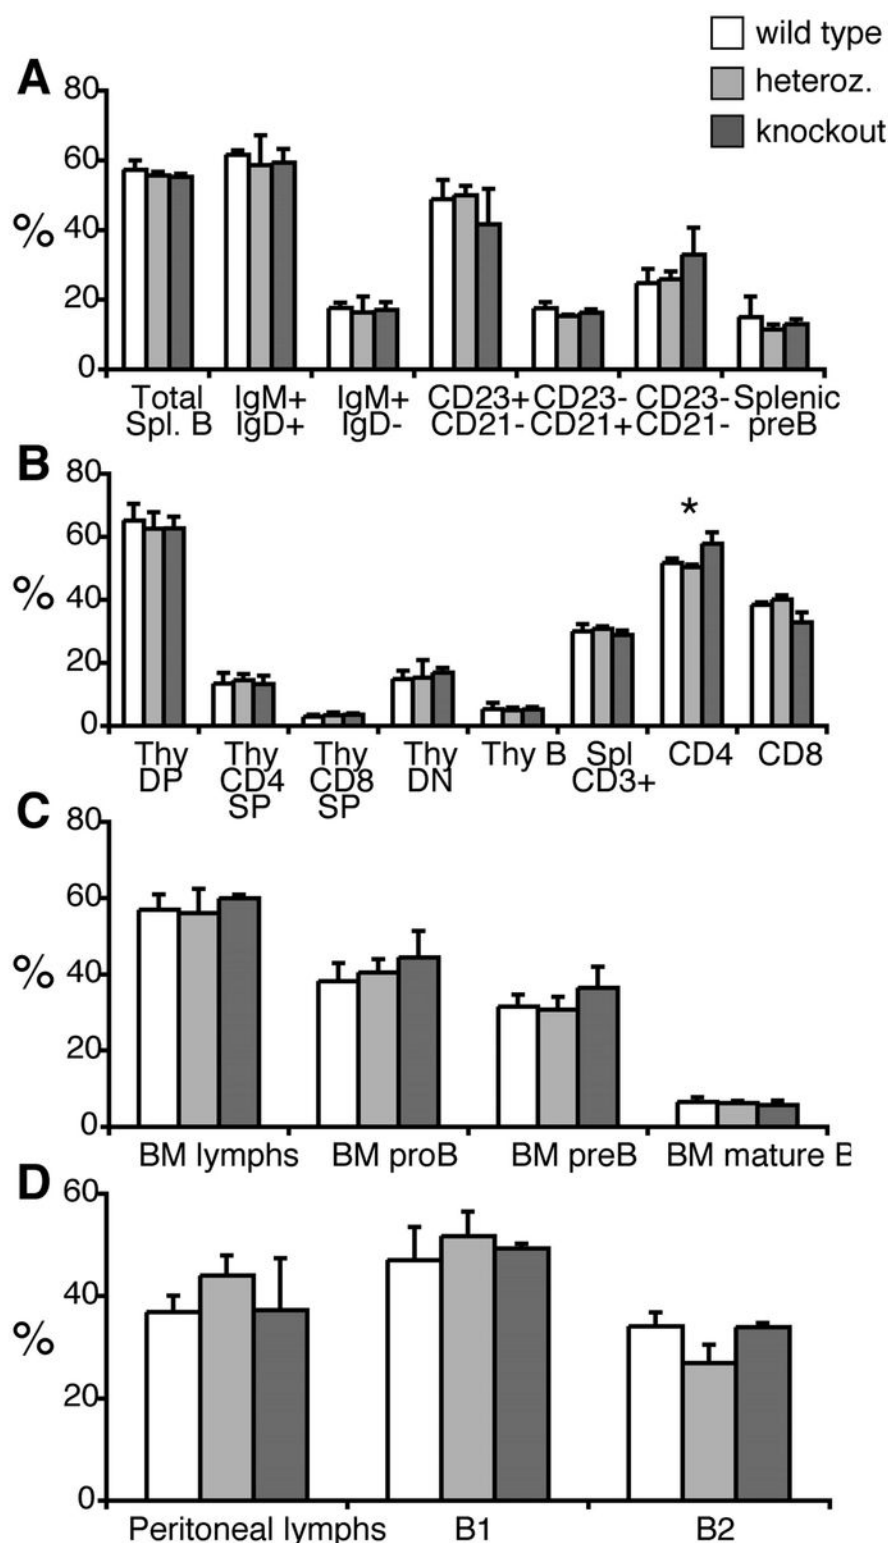

**Figure S1. Lymphoid subpopulations in young *S1P2*<sup>-/-</sup>, *S1P2*<sup>+/-</sup> and *S1P2*<sup>+/+</sup> mice.** **A)** Splenic B cell subsets: Total Splenic B cells (Total Spl. B; % of splenic lymphoid cells), Follicular and marginal zone B cells (defined by IgM and IgD or CD23 and CD21 staining; % of total B cells) and splenic pre-B cells (% of total B cells). **B)** Thymic and Splenic T cell subsets (% of total thymocytes and splenocytes respectively); **C)** Bone Marrow lymphoid subsets: BM lymphocytes (BM lymphs; % of total marrow cells) BM pro, pre and mature B cells (% of total BM lymphoid cells); **D)** Peritoneal subsets: Peritoneal lymphocytes (% of total peritoneal cells), B1 and B2 subsets (defined by CD5 and IgM staining; % of total peritoneal lymphocytes). All data are expressed as mean  $\pm$  SD, as obtained by FACS analysis of the indicated cell populations. N= 5 wild type; 3 heterozygous; 3 knockout. Note the statistically significant small increase in CD4<sup>+</sup> T cells in *S1P2*<sup>-/-</sup> mice ( $p < 0.015$ ) in B (asterisk). DP, double positive; SP, single positive.
