# Supplementary material for: Targeted Disruption of the S1P 2 Sphingosine 1-Phosphate Receptor Gene Leads to Diffuse Large B-Cell Lymphoma Formation
Source: Oxford University Press journal article supplement (doi:10.1158/0008-5472.can-09-1110), 2009-11-10
Supplement: 00085472can091110-sup-sfig_2.pdf [file 00085472can091110-sup-sfig_2.pdf]

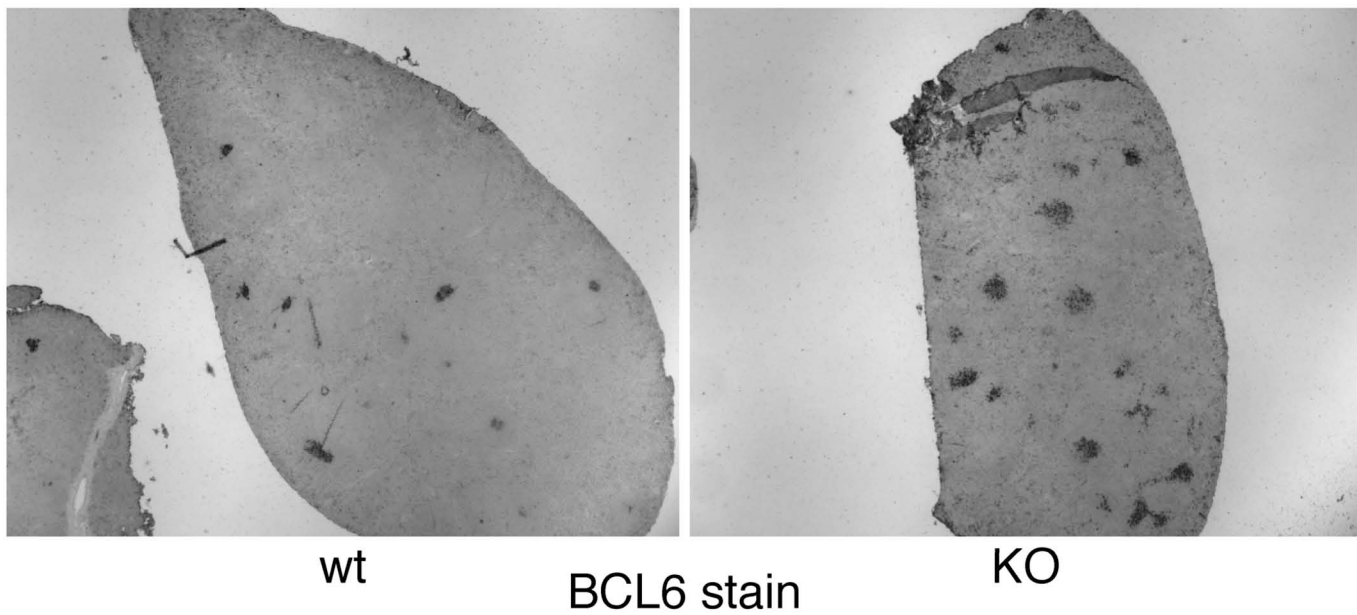

**Figure S2. Increased germinal centers in  $S1P2^{-/-}$  mice.** Representative immunohistochemical staining of BCL6 expression in spleens from control wild-type (wt) and  $S1P2^{-/-}$  (KO) mice, which were used to generate the quantitative GC formation data presented in Figure 4.
