# Supplementary material for: Targeted Disruption of the S1P 2 Sphingosine 1-Phosphate Receptor Gene Leads to Diffuse Large B-Cell Lymphoma Formation
Source: Oxford University Press journal article supplement (doi:10.1158/0008-5472.can-09-1110), 2009-11-10
Supplement: 00085472can091110-sup-sfig_3.pdf [file 00085472can091110-sup-sfig_3.pdf]

WT

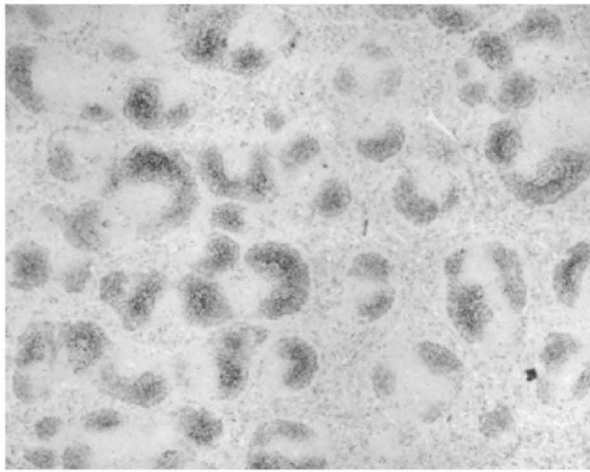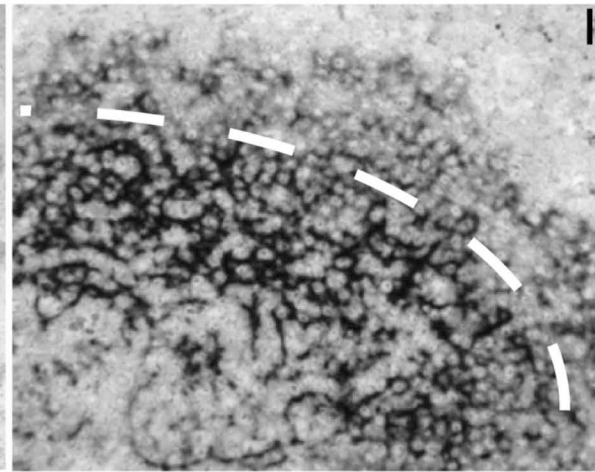

KO

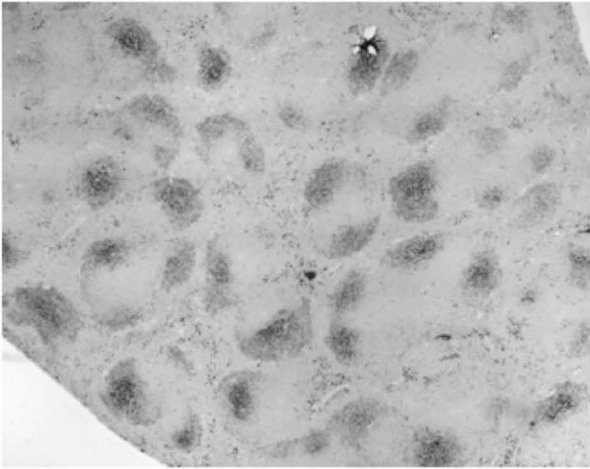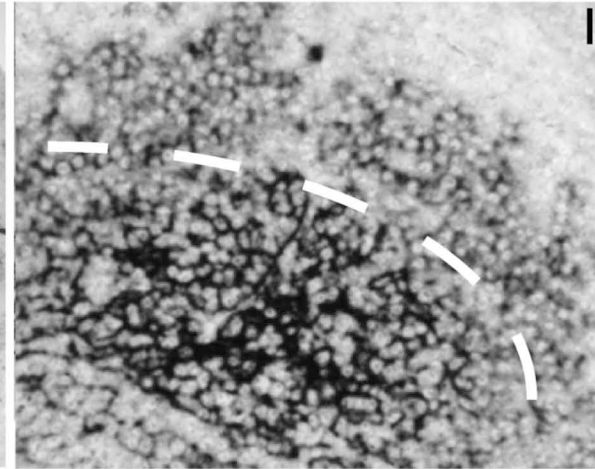

**Figure S3. Preserved splenic immunoarchitecture in healthy  $S1P_2^{-/-}$  mice.** Representative spleen sections from a wild type (WT) and a knockout (KO) mouse, stained for CD21. Note the preserved follicular structure and marginal zone, which did not consistently differ between WT and KO littermates. The marginal sinus is marked by an interrupted line, dividing the CD21 strongly stained follicular dendritic cells and the moderately CD21+ marginal zone B cells outside the follicle. Scale bar: left column, 10 $\mu$ m; right column, 1 $\mu$ m.
