# Supplementary material for: Targeted Disruption of the S1P 2 Sphingosine 1-Phosphate Receptor Gene Leads to Diffuse Large B-Cell Lymphoma Formation
Source: Oxford University Press journal article supplement (doi:10.1158/0008-5472.can-09-1110), 2009-11-10
Supplement: 00085472can091110-sup-sfig_4.pdf [file 00085472can091110-sup-sfig_4.pdf]

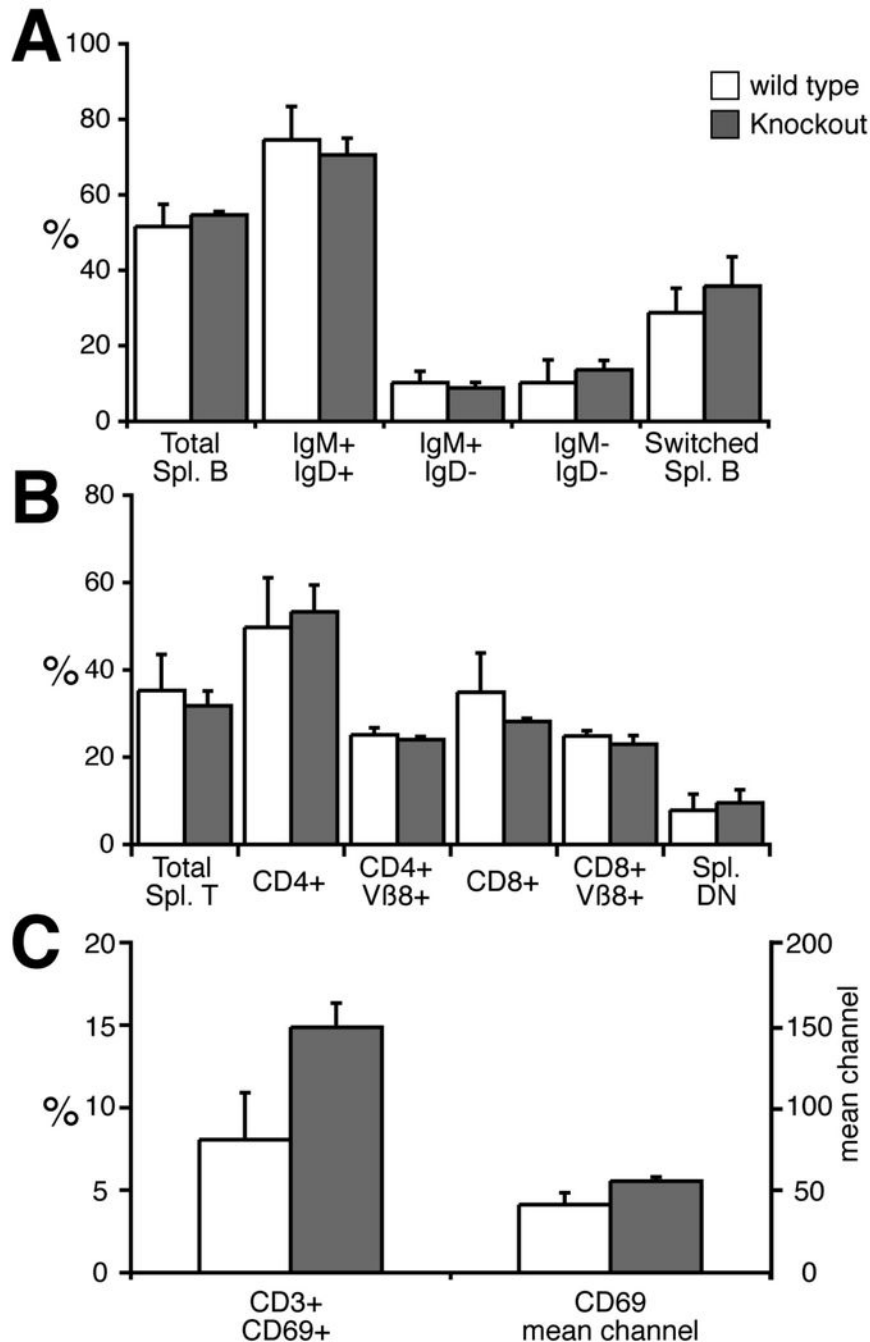

**Figure S4. Lymphoid subpopulations in old *S1P2*<sup>-/-</sup> and *S1P2*<sup>+/-</sup> mice.** **A)** Splenic B cell subsets: Total Splenic B cells (Total Spl. B; % of splenic lymphoid cells), Follicular, marginal zone and switched B cells, defined by IgM and IgD staining. Switched B cells are defined as B220<sup>+</sup>, IgM<sup>-</sup>, IgD<sup>-</sup> B cells expressing surface kappa light chain; % of total B cells). **B)** Splenic T cell subsets: Total splenic T cells (% of total splenic lymphoid cells), CD4<sup>+</sup> and CD8<sup>+</sup> subsets (% of total T cells), Vβ8<sup>+</sup> subsets (% of the CD4 and CD8 populations) and double negative (DN), CD4<sup>-</sup>, CD8<sup>-</sup>, CD3<sup>+</sup> splenic T cells (% of total T cells). **C)** Splenic CD69<sup>+</sup> T cells (% of total lymphocytes) and mean fluorescence channel. There was a significant increase in the percentage and intensity of CD69 label (both  $p < 0.025$ ).  $N = 4$  wild type; 3 knockout. All values are presented as mean  $\pm$  SD
