# Supplementary material for: Targeted Disruption of the S1P 2 Sphingosine 1-Phosphate Receptor Gene Leads to Diffuse Large B-Cell Lymphoma Formation
Source: Oxford University Press journal article supplement (doi:10.1158/0008-5472.can-09-1110), 2009-11-10
Supplement: 00085472can091110-sup-sfig_5.pdf [file 00085472can091110-sup-sfig_5.pdf]

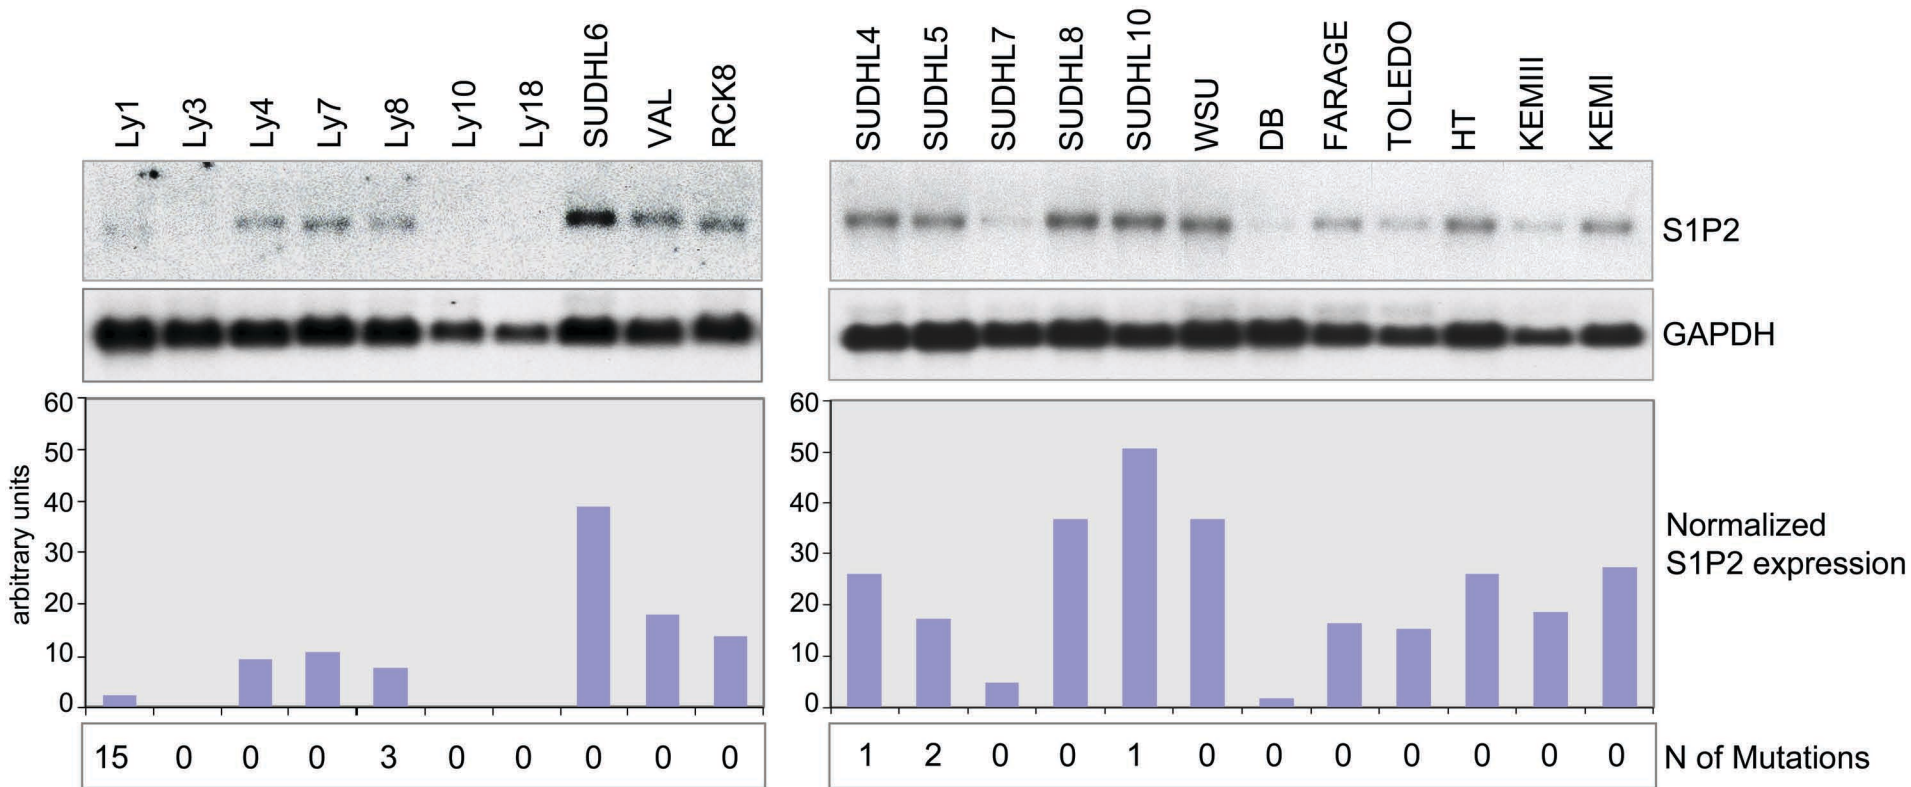

**Figure S5. Heterogeneous *S1P2* expression in DLBCL.** Northern blot analysis of *S1P2* expression in 20 DLBCL cell lines and two isogenic Burkitt lymphoma cell lines (KEMI and KEMIII) corresponding respectively to the group I/latency I and group III/latency III phenotype of EBV infection, and representative of distinct B cell differentiation stages (group I: LMP1 negative, non-activated, GC phenotype; Group III: LMP1 positive, activation/adhesion molecules positive, post-GC, lymphoblastoid cell-like phenotype)(Rowe et al., EMBO J, 1987). Bottom panel: *S1P2* expression levels, normalized for GAPDH control and quantitated by Phosphorimager. The number of mutations affecting the gene 5' sequences is indicated for each sample.
