# Supplementary material for: Targeted Disruption of the S1P 2 Sphingosine 1-Phosphate Receptor Gene Leads to Diffuse Large B-Cell Lymphoma Formation
Source: Oxford University Press journal article supplement (doi:10.1158/0008-5472.can-09-1110), 2009-11-10
Supplement: 00085472can091110-sup-sfig_6.pdf [file 00085472can091110-sup-sfig_6.pdf]

**A**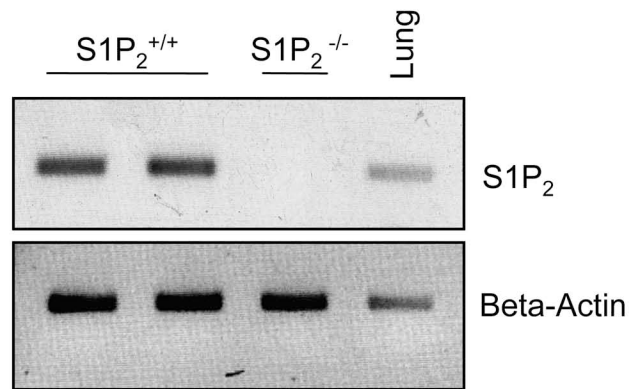**B**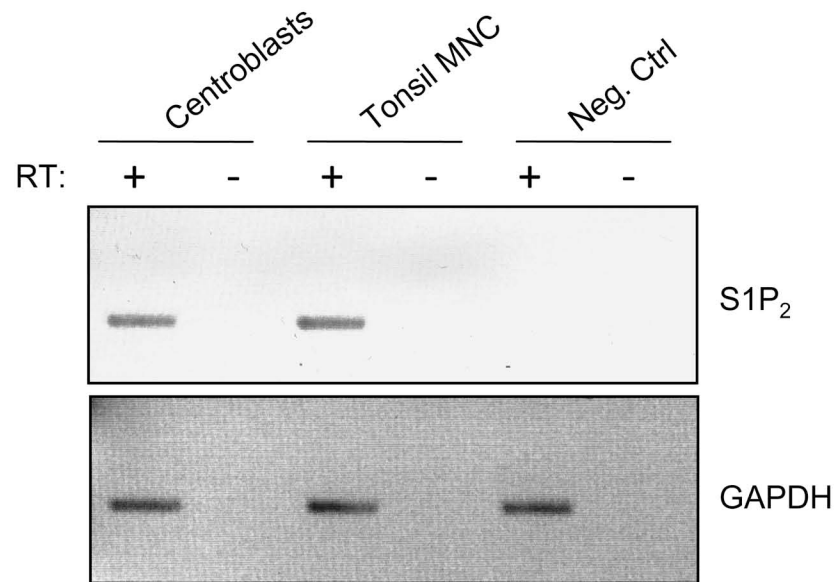

**Figure S6. S1P<sub>2</sub> is expressed in both human and mouse germinal center B cells.** **A)** Expression of S1P<sub>2</sub> in mouse GC B cells. RT-PCR was performed on Dnase I-treated RNA obtained from wild type (+/+) and knock-out (-/-) mouse GC B cells. RNA extracted from mouse lung, known to express high levels of S1P<sub>2</sub>, was used as a positive control. **B)** Expression of S1P<sub>2</sub> in human GC B cells. RT-PCR analysis was performed with and without reverse transcriptase (RT) on MACS- purified human centroblasts and tonsil mononucleated cells (MNC).
