# Supplementary material for: Targeted Disruption of the S1P 2 Sphingosine 1-Phosphate Receptor Gene Leads to Diffuse Large B-Cell Lymphoma Formation
Source: Oxford University Press journal article supplement (doi:10.1158/0008-5472.can-09-1110), 2009-11-10
Supplement: 00085472can091110-sup-sfig_7.pdf [file 00085472can091110-sup-sfig_7.pdf]

**A**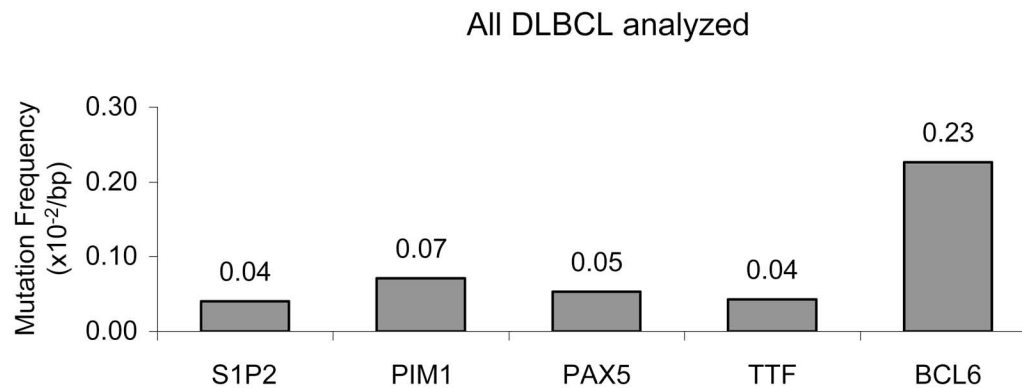**B**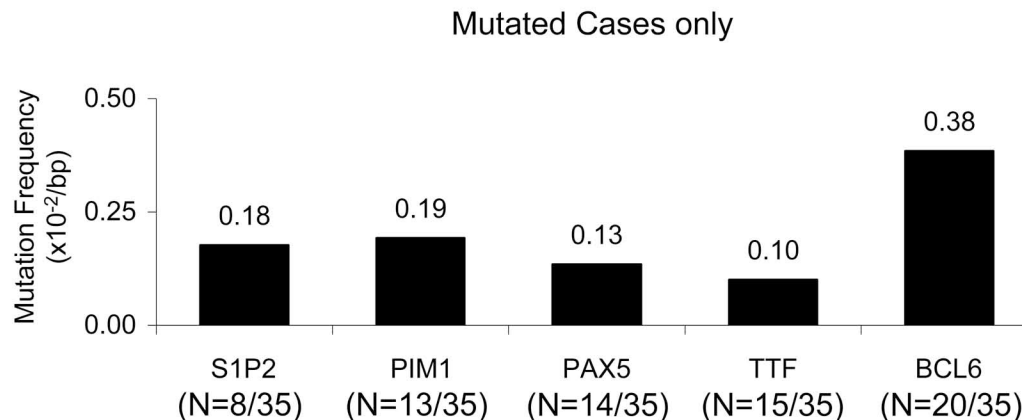

**Figure S7. Mutation frequency of the S1P2 5' sequences in DLBCL, as compared to previously identified targets of physiologic and aberrant SHM. A)** Mutation frequency of the indicated genes in DLBCL (N=35, including 20 cell lines and 15 primary biopsies from Table S3). The region analyzed in each gene corresponds to ~1.3Kb from the respective transcription initiation site and was amplified from genomic DNA as described in the Methods. Frequencies were calculated considering 2 alleles/case in all 35 samples analyzed, and values are shown on top. **B)** Mutation frequency of the indicated genes in mutated DLBCL samples. For each gene, the number of mutated cases over total analyzed is given in brackets, and the mutation frequency is shown on the top.
