# Supplementary material for: Targeted Disruption of the S1P 2 Sphingosine 1-Phosphate Receptor Gene Leads to Diffuse Large B-Cell Lymphoma Formation
Source: Oxford University Press journal article supplement (doi:10.1158/0008-5472.can-09-1110), 2009-11-10
Supplement: 00085472can091110-sup-smethods.pdf [file 00085472can091110-sup-smethods.pdf]

## Supplementary methods

**Isolation of human and mouse GC B cells.** Human GC B cells were purified as previously described (Klein *et al*, 2003). Mouse splenic B cells were isolated from wild-type and  $S1P_2^{-/-}$  animals ten days after immunization with sheep red blood cells, using the MACS B cell isolation kit (Miltenyi Biotec). For purification of the GC B cell subpopulation, single cell suspensions were stained with fluorochrome-conjugated PNA, anti-B220 and anti-CD95/FAS antibodies (BD-Pharmingen), and the triple positive cells were sorted.

**Mutation analysis of the  $S1P2$  gene in normal B cell subpopulations.** Genomic DNA was extracted from naive ( $IgD^+CD27^+$ ) and GC ( $CD38^+CD77^+$ ) B cell populations purified from human tonsils of healthy individuals as described in Ref.40, and used for amplification of  $S1P2$  (1252 bp),  $BCL6$  (781 bp) and the rearranged  $IgV_H$  genes using the Pfu Turbo polymerase (Stratagene). The IMR91 fibroblast cell line was included as a control for background error rate. After 30 cycles (35 for  $IgV_H$ ), PCR products were purified, incubated with 200 mM dATP and Taq polymerase (GIBCO BRL) for 15 min at 72°C, and cloned into the pGEM-T vector (Promega) as recommended by the manufacturer. Seventy-five to 122 clones were analyzed from each  $S1P2$  amplicon.

## References

1. Klein U, Tu Y, Stolovitzky GA, et al. Transcriptional analysis of the B cell germinal center reaction. *Proc Natl Acad Sci USA*. 2003;100(5):2639-44.
